# Supplementary material
Source: MDPI journal article supplement (https://www.mdpi.com/2073-445X/10/9/886)
Supplement: s1 [file s1]

**S3 Table. Content of the forms and values of Zn pollution indices in sandy soils**

| City | Land use<br>/<br>Horizon |      | Depth  | Zn <sub>t</sub> | Zn <sub>a</sub> | Fractions [mg/kg] |       |       |                                   | Zn indices     |                  |      |       |       |
|------|--------------------------|------|--------|-----------------|-----------------|-------------------|-------|-------|-----------------------------------|----------------|------------------|------|-------|-------|
|      |                          |      |        | [mg/kg]         | I               | II                | III   | IV    | C <sub>a</sub><br>/C <sub>t</sub> | C <sub>f</sub> | I <sub>geo</sub> | BF   |       |       |
| BP   | DG                       | Ap   | 0-20   | 144.00          | 114.50          | 32.11             | 53.24 | 23.46 | 35.19                             | 79.51          | 16.13            | 3.43 | 75.56 |       |
|      |                          | A    | 20-36  | 154.75          | 115.20          | 31.16             | 52.49 | 24.06 | 47.04                             | 74.44          | 17.34            | 3.53 | 69.60 |       |
|      |                          | A/C  | 36-65  | 56.97           | 27.00           | 15.16             | 7.55  | 3.24  | 31.01                             | 47.40          | 6.38             | 2.09 | 45.56 |       |
|      |                          | CG   | 65-111 | 15.30           | 3.42            | 2.46              | 2.31  | 1.66  | 8.87                              | 22.37          | 1.71             | 0.19 | 42.00 |       |
|      |                          | G    | >111   | 8.93            | 3.28            | 2.09              | 2.02  | 1.75  | 3.07                              | 36.75          | -                | -    | 65.61 |       |
|      | AG                       | Ap   | 0-20   | 33.60           | 22.60           | 7.68              | 9.97  | 3.74  | 12.21                             | 67.26          | 2.18             | 0.54 | 63.65 |       |
|      |                          | A    | 20-32  | 30.10           | 19.80           | 8.32              | 8.90  | 3.48  | 9.41                              | 65.77          | 1.95             | 0.38 | 68.74 |       |
|      |                          | Es   | 32-69  | 15.15           | 3.32            | 2.86              | 1.75  | 1.90  | 8.64                              | 21.93          | 0.98             | 0.00 | 42.98 |       |
|      |                          | Bhs  | 69-91  | 9.88            | 5.07            | 2.29              | 1.74  | 1.80  | 4.04                              | 51.36          | 0.64             | 0.00 | 59.09 |       |
|      | A                        | CG   | >91    | 15.40           | 6.09            | 1.68              | 1.67  | 1.49  | 10.56                             | 39.54          | -                | -    | 31.40 |       |
|      |                          | Ap   | 0-27   | 12.75           | 5.15            | 3.08              | 1.82  | 1.71  | 6.14                              | 40.35          | 1.64             | 0.13 | 51.85 |       |
|      |                          | Es   | 27-47  | 12.65           | 4.33            | 2.71              | 1.42  | 1.44  | 7.07                              | 34.20          | 1.63             | 0.12 | 44.08 |       |
|      |                          | Bhs  | 47-82  | 9.99            | 2.66            | 1.82              | 2.26  | 1.92  | 3.99                              | 26.65          | 1.29             | 0.00 | 60.07 |       |
|      |                          | C    | >82    | 7.76            | 1.66            | 1.45              | 1.30  | 2.15  | 2.86                              | 21.42          | -                | -    | 63.16 |       |
|      | LU                       | DG   | Ap     | 0-20            | 36.70           | 29.06             | 7.29  | 15.19 | 9.18                              | 5.04           | 79.19            | 2.61 | 0.80  | 86.26 |
|      |                          |      | A      | 20-35           | 17.10           | 11.03             | 5.14  | 6.21  | 3.58                              | 2.17           | 64.50            | 1.22 | 0.00  | 87.29 |
| Bv   |                          |      | 35-65  | 9.46            | 1.90            | 1.44              | 2.53  | 1.99  | 3.50                              | 20.08          | 0.67             | 0.00 | 62.96 |       |
| C    |                          |      | >65    | 14.05           | 0.92            | 1.27              | 1.58  | 1.99  | 9.20                              | 6.52           | -                | -    | 34.49 |       |
| AG   |                          | Ap   | 0-20   | 18.90           | 16.80           | 7.86              | 6.04  | 3.83  | 1.17                              | 88.87          | 1.54             | 0.03 | 93.79 |       |
|      |                          | A    | 20-35  | 27.55           | 7.19            | 5.88              | 4.33  | 3.00  | 14.35                             | 26.09          | 2.24             | 0.58 | 47.92 |       |
|      |                          | Bhs  | 35-50  | 16.45           | 4.39            | 1.76              | 1.34  | 1.71  | 11.64                             | 26.69          | 1.34             | 0.00 | 29.22 |       |
|      |                          | G    | 50-67  | 12.15           | 1.50            | 1.26              | 1.24  | 1.62  | 8.03                              | 12.30          | 0.99             | 0.00 | 33.88 |       |
|      |                          | C    | >67    | 12.30           | 6.77            | 1.29              | 1.09  | 1.65  | 8.28                              | 55.00          | -                | -    | 32.69 |       |
| A    |                          | Ap   | 0-20   | 22.36           | 8.64            | 4.73              | 2.92  | 3.76  | 10.94                             | 38.63          | 1.49             | 0.00 | 51.04 |       |
|      |                          | Bv   | 20-50  | 9.81            | 2.83            | 1.79              | 1.52  | 2.22  | 4.28                              | 28.81          | 0.65             | 0.00 | 56.38 |       |
|      |                          | C    | >50    | 15.00           | 0.27            | 1.30              | 1.53  | 1.59  | 10.58                             | 1.81           | -                | 0.00 | 29.44 |       |
| T    | DG                       | Ap   | 0-20   | 56.35           | 27.70           | 6.29              | 10.24 | 5.03  | 34.79                             | 49.15          | 1.63             | 0.12 | 38.26 |       |
|      |                          | A    | 20-40  | 52.20           | 24.30           | 5.26              | 10.11 | 5.72  | 31.11                             | 46.54          | 1.51             | 0.01 | 40.40 |       |
|      |                          | A    | 40-65  | 45.45           | 14.35           | 2.24              | 6.13  | 3.58  | 33.50                             | 31.57          | 1.31             | 0.00 | 26.28 |       |
|      |                          | AG   | 65-90  | 35.33           | 10.41           | 1.88              | 4.84  | 3.68  | 24.94                             | 29.45          | 1.02             | 0.00 | 29.42 |       |
|      |                          | G    | >100   | 34.65           | 9.50            | 1.80              | 5.03  | 3.23  | 24.59                             | 27.40          | -                | -    | 29.02 |       |
|      | AG                       | Ap   | 0-20   | 49.63           | 27.43           | 10.06             | 11.89 | 4.23  | 23.45                             | 55.27          | 1.73             | 0.21 | 52.75 |       |
|      |                          | A    | 20-40  | 20.45           | 8.60            | 3.72              | 5.11  | 2.30  | 9.32                              | 42.05          | 0.71             | 0.00 | 54.41 |       |
|      |                          | A    | 40-60  | 19.45           | 1.56            | 1.73              | 2.31  | 2.22  | 13.18                             | 8.02           | 0.68             | 0.00 | 32.22 |       |
|      |                          | AG   | 60-80  | 18.15           | 1.57            | 1.92              | 2.21  | 2.13  | 11.88                             | 8.62           | 0.63             | 0.00 | 34.52 |       |
|      |                          | G    | 80-100 | 23.85           | 4.02            | 1.04              | 2.28  | 2.27  | 18.26                             | 16.83          | 0.83             | 0.00 | 23.44 |       |
|      |                          | C    | >100   | 28.68           | 4.23            | 0.96              | 2.25  | 1.71  | 23.75                             | 14.75          | -                | -    | 17.18 |       |
|      |                          | Ap   | 0-20   | 21.58           | 7.23            | 4.14              | 2.75  | 2.52  | 12.17                             | 33.48          | 2.13             | 0.51 | 43.60 |       |
|      | A                        | A    | 20-32  | 16.22           | 7.12            | 3.16              | 2.66  | 2.57  | 7.83                              | 43.90          | 1.60             | 0.09 | 51.74 |       |
|      |                          | Bv   | 32-55  | 13.88           | 1.86            | 2.50              | 1.78  | 1.55  | 8.06                              | 13.39          | 1.37             | 0.00 | 41.93 |       |
|      |                          | Bv/C | 55-130 | 10.64           | 1.68            | 2.22              | 1.64  | 3.37  | 3.41                              | 15.82          | 1.05             | 0.00 | 67.95 |       |
|      |                          | C    | >130   | 10.14           | 1.56            | 2.39              | 1.78  | 1.88  | 4.09                              | 15.35          | -                | -    | 59.65 |       |

Explanations: BP – Biała Podlaska, LU – Lubartów, T – Tarnobrzeg, DG – domestic garden,

AG – allotment garden, A - arable field
