# Supplementary material
Source: MDPI journal article supplement (https://www.mdpi.com/2073-445X/10/9/886)
Supplement: s1 [file s1]

**S2 Table. Basic physicochemical properties of silty soils**

| City | Land use / Horizon |      | Depth   | pH in H <sub>2</sub> O | pH in KCl | C [g/kg] | N [g/kg] | HA        | S      | CEC    | Soil composition |
|------|--------------------|------|---------|------------------------|-----------|----------|----------|-----------|--------|--------|------------------|
|      |                    |      |         |                        |           |          |          | [mmol/kg] |        |        |                  |
| LB   | DG                 | Ap   | 0-27    | 6.7                    | 6.5       | 5.85     | 9.08     | 7.50      | 63.97  | 71.47  | loamy sand       |
|      |                    | A/Et | 27-60   | 6.9                    | 5.8       | 2.40     | 11.43    | 6.37      | 22.24  | 28.61  |                  |
|      |                    | Bt   | 60-85   | 6.5                    | 5.1       | 1.44     | 17.14    | 6.00      | 15.46  | 21.46  |                  |
|      |                    | C    | >85     | 6.3                    | 5.1       | 0.99     | 9.90     | 5.62      | 26.15  | 31.77  |                  |
|      | AG                 | Ap   | 0-25    | 7.9                    | 7.6       | 8.83     | 9.29     | 3.38      | 89.40  | 92.78  | silt loam        |
|      |                    | Et   | 25-45   | 8.4                    | 7.8       | 1.29     | 4.96     | 2.40      | 86.08  | 88.48  |                  |
|      |                    | Bt   | 45-55   | 8.6                    | 8.0       | 1.17     | 5.57     | 2.40      | 57.76  | 60.16  |                  |
|      |                    | C    | >55     | 8.5                    | 7.9       | 1.08     | 5.14     | 2.80      | 86.48  | 89.28  |                  |
|      | A                  | Ap   | 0-25    | 7.7                    | 7.5       | 6.86     | 7.22     | 4.65      | 76.78  | 81.43  | silt loam        |
|      |                    | Et   | 25-50   | 7.2                    | 6.3       | 3.48     | 8.29     | 6.90      | 53.41  | 60.31  |                  |
|      |                    | Bt1  | 50-60   | 6.7                    | 5.4       | 2.60     | 6.84     | 10.35     | 73.60  | 83.95  |                  |
|      |                    | Bt2  | 60-80   | 6.6                    | 5.2       | 2.12     | 6.06     | 11.78     | 77.62  | 89.40  |                  |
|      |                    | Bt/C | 80-100  | 6.6                    | 5.1       | 1.88     | 7.83     | 10.13     | 77.47  | 87.60  |                  |
|      |                    | C    | 100-120 | 6.4                    | 5.1       | 1.76     | 7.33     | 9.53      | 63.68  | 73.20  |                  |
|      |                    | C    | 120-140 | 6.2                    | 4.8       | 0.96     | 5.65     | 8.25      | 59.74  | 67.99  |                  |
| P    | DG                 | Ap   | 0-20    | 6.7                    | 6.2       | 16.13    | 1.80     | 12.53     | 96.95  | 109.47 | silt loam        |
|      |                    | A    | 20-41   | 6.6                    | 6.0       | 13.39    | 1.55     | 12.98     | 91.82  | 104.79 |                  |
|      |                    | Et   | 41-67   | 6.4                    | 5.3       | 2.49     | 0.88     | 10.73     | 86.89  | 97.61  |                  |
|      |                    | Bt1  | 67-130  | 6.2                    | 4.9       | 2.06     | 0.43     | 11.78     | 93.77  | 105.55 |                  |
|      |                    | Bt2  | 130-150 | 5.5                    | 4.3       | 1.26     | 0.35     | 14.03     | 91.18  | 105.20 |                  |
|      | AG                 | Ap   | 0-20    | 7.3                    | 7.3       | 15.40    | 1.72     | 6.00      | 113.43 | 119.43 | silt loam        |
|      |                    | A    | 20-33   | 7.4                    | 7.2       | 12.60    | 1.50     | 6.00      | 113.33 | 119.33 |                  |
|      |                    | Et   | 33-59   | 7.4                    | 7.1       | 6.26     | 0.85     | 6.15      | 102.53 | 108.68 |                  |
|      |                    | Bt1  | 59-95   | 7.5                    | 6.8       | 4.94     | 0.67     | 4.88      | 83.56  | 88.44  |                  |
|      |                    | Bt2  | 95-128  | 7.5                    | 6.8       | 5.40     | 0.45     | 5.25      | 79.53  | 84.78  |                  |
|      |                    | C    | >128    | 7.5                    | 6.6       | 2.94     | 0.73     | 4.50      | 86.14  | 90.64  |                  |
|      | A                  | Ap   | 0-25    | 7.1                    | 6.5       | 9.02     | 1.15     | 7.50      | 98.09  | 105.59 | silt loam        |
|      |                    | Bt1  | 25-40   | 7.3                    | 6.2       | 2.46     | 0.49     | 6.15      | 88.24  | 94.39  |                  |
|      |                    | Bt2  | 40-88   | 7.4                    | 6.1       | 1.10     | 0.32     | 5.85      | 85.10  | 90.95  |                  |
|      |                    | C    | >88     | 7.5                    | 6.1       | 1.22     | 0.26     | 5.03      | 91.06  | 96.08  |                  |
| Z    | DG                 | Ap   | 0-24    | 7.7                    | 7.3       | 19.12    | 1.64     | 3.23      | 94.36  | 97.59  | silt loam        |
|      |                    | Et   | 24-60   | 7.8                    | 7.5       | 6.24     | 0.81     | 2.48      | 95.72  | 98.20  |                  |
|      |                    | Bt   | 60-104  | 7.8                    | 7.4       | 6.96     | 0.88     | 3.00      | 92.23  | 95.23  |                  |
|      |                    | C    | >104    | 7.7                    | 7.5       | 1.88     | 0.32     | 3.53      | 74.68  | 78.20  |                  |
|      | AG                 | Ap   | 0-27    | 7.5                    | 7.0       | 8.52     | 1.17     | 3.75      | 97.99  | 101.74 | silt loam        |
|      |                    | Bt   | 27-82   | 7.9                    | 7.1       | 1.17     | 0.26     | 3.00      | 85.23  | 88.23  |                  |
|      |                    | C    | >82     | 8.2                    | 7.7       | 0.56     | 0.18     | 2.25      | 94.18  | 96.43  |                  |
|      | A                  | Ap   | 0-23    | 6.8                    | 6.5       | 16.20    | 1.73     | 6.98      | 98.15  | 105.12 | silt loam        |
|      |                    | Et   | 23-39   | 7.0                    | 6.7       | 5.79     | 0.84     | 4.50      | 90.23  | 94.73  |                  |
|      |                    | Bt   | 39-101  | 7.3                    | 6.5       | 1.95     | 0.49     | 3.98      | 103.42 | 107.39 |                  |
|      |                    | C    | >101    | 7.9                    | 7.6       | 0.80     | 0.25     | 2.25      | 97.38  | 99.63  |                  |

Explanations: LB – Lublin, P – Przemyśl, Z – Zamość, DG – domestic garden, AG –

allotment garden, A - arable field
