# Supplementary material
Source: MDPI journal article supplement (https://www.mdpi.com/2073-445X/10/9/886)
Supplement: s1 [file s1]

**S1 Table. Basic physicochemical properties of sandy soils**

| City | Land use<br>/<br>Horizon | Depth | pH<br>in<br>H <sub>2</sub> O | pH<br>in<br>KCl | C<br>[g/kg] | N<br>[g/kg] | HA        | S     | CEC    | Soil<br>composition |                           |
|------|--------------------------|-------|------------------------------|-----------------|-------------|-------------|-----------|-------|--------|---------------------|---------------------------|
|      |                          |       |                              |                 |             |             | [mmol/kg] |       |        |                     |                           |
| BP   | DG                       | Ap    | 0-20                         | 7.3             | 7.1         | 37.02       | 2.20      | 8.48  | 101.85 | 110.33              | loamy sand<br>/sand       |
|      |                          | A     | 20-36                        | 7.4             | 7.1         | 32.22       | 2.14      | 7.88  | 102.76 | 110.63              |                           |
|      |                          | A/C   | 36-65                        | 7.2             | 6.8         | 7.20        | 0.59      | 6.60  | 57.19  | 63.79               |                           |
|      |                          | CG    | 65-111                       | 6.7             | 5.9         | 1.47        | 0.19      | 5.48  | 22.36  | 27.83               |                           |
|      |                          | G     | >111                         | 6.8             | 6.0         | 0.51        | 0.13      | 3.38  | 13.95  | 17.32               |                           |
|      | AG                       | Ap    | 0-20                         | 6.8             | 6.5         | 20.95       | 1.70      | 10.50 | 93.70  | 104.20              | loamy sand<br>/sand       |
|      |                          | A     | 20-32                        | 6.5             | 6.0         | 19.27       | 1.59      | 15.00 | 74.77  | 89.77               |                           |
|      |                          | Es    | 32-69                        | 5.4             | 4.4         | 1.71        | 0.28      | 10.28 | 14.48  | 24.75               |                           |
|      |                          | Bhs   | 69-91                        | 5.2             | 4.2         | 0.56        | 0.14      | 6.38  | 17.99  | 24.37               |                           |
|      | A                        | CG    | >91                          | 5.5             | 4.5         | 0.60        | 0.12      | 6.15  | 18.91  | 25.06               | sand                      |
|      |                          | Ap    | 0-27                         | 5.1             | 3.7         | 8.49        | 0.57      | 21.37 | 10.67  | 32.04               |                           |
|      |                          | Es    | 27-47                        | 5.1             | 4.0         | 5.49        | 0.18      | 16.50 | 14.33  | 30.83               |                           |
|      |                          | Bhs   | 47-82                        | 5.2             | 4.2         | 0.75        | 0.12      | 10.50 | 13.56  | 24.06               |                           |
|      | LU                       | DG    | C                            | >82             | 5.2         | 4.2         | 0.52      | 0.10  | 7.12   | 4.62                | 11.74                     |
| Ap   |                          |       | 0-20                         | 6.6             | 6.3         | 21.30       | 1.72      | 9.75  | 92.08  | 101.83              |                           |
| A    |                          |       | 20-35                        | 6.7             | 6.5         | 10.00       | 0.83      | 6.75  | 68.19  | 74.94               |                           |
| Bv   |                          |       | 35-65                        | 6.5             | 5.9         | 1.56        | 0.10      | 3.75  | 29.81  | 33.56               |                           |
| AG   |                          | C     | >65                          | 6.6             | 5.9         | 1.20        | 0.00      | 3.00  | 18.79  | 21.79               | loamy sand                |
|      |                          | Ap    | 0-20                         | 6.2             | 5.5         | 13.80       | 1.15      | 12.52 | 61.44  | 73.96               |                           |
|      |                          | A     | 20-35                        | 5.8             | 5.1         | 5.79        | 0.57      | 12.25 | 53.74  | 65.99               |                           |
|      |                          | Bhs   | 35-50                        | 6.0             | 5.4         | 3.00        | 2.03      | 9.22  | 43.47  | 52.69               |                           |
|      |                          | G     | 50-67                        | 6.2             | 5.3         | 1.74        | 0.10      | 8.25  | 52.86  | 61.11               |                           |
| A    |                          | C     | >67                          | 6.5             | 5.9         | 1.44        | 0.10      | 3.00  | 15.13  | 18.13               | sand                      |
|      |                          | Ap    | 0-20                         | 4.8             | 4.0         | 8.40        | 0.81      | 17.25 | 17.12  | 34.37               |                           |
|      |                          | Bv    | 20-50                        | 4.9             | 3.7         | 7.64        | 0.62      | 9.75  | 9.84   | 19.59               |                           |
|      | C                        | >50   | 6.0                          | 4.4             | 0.84        | 0.10        | 5.47      | 18.98 | 24.45  |                     |                           |
| T    | DG                       | Ap    | 0-20                         | 7.3             | 7.2         | 15.24       | 1.65      | 5.40  | 93.07  | 98.47               | loamy sand                |
|      |                          | A     | 20-40                        | 7.2             | 7.0         | 13.44       | 1.52      | 6.38  | 94.08  | 100.45              |                           |
|      |                          | A     | 40-65                        | 6.8             | 6.3         | 10.84       | 1.23      | 7.50  | 90.01  | 97.51               |                           |
|      |                          | AG    | 65-90                        | 6.8             | 6.2         | 6.48        | 0.68      | 6.75  | 87.12  | 93.87               |                           |
|      |                          | G     | >100                         | 7.0             | 6.3         | 2.58        | 0.38      | 4.73  | 86.13  | 90.86               |                           |
|      | AG                       | Ap    | 0-20                         | 7.0             | 7.0         | 13.39       | 1.29      | 6.15  | 78.49  | 84.64               | loamy sand<br>/sandy loam |
|      |                          | A     | 20-40                        | 7.1             | 7.1         | 7.63        | 0.81      | 4.50  | 65.36  | 69.86               |                           |
|      |                          | A     | 40-60                        | 7.0             | 6.6         | 4.68        | 0.52      | 4.28  | 47.58  | 51.85               |                           |
|      |                          | AG    | 60-80                        | 7.0             | 6.5         | 1.98        | 0.28      | 3.38  | 32.49  | 35.87               |                           |
|      |                          | G     | 80-100                       | 7.0             | 6.0         | 2.25        | 0.40      | 4.65  | 71.97  | 76.62               |                           |
|      |                          | C     | >100                         | 6.8             | 5.8         | 1.08        | 0.42      | 5.10  | 92.81  | 97.91               |                           |
|      | A                        | Ap    | 0-20                         | 4.3             | 3.8         | 7.32        | 0.73      | 22.88 | 10.61  | 33.49               | sand                      |
|      |                          | A     | 20-32                        | 4.3             | 3.7         | 5.22        | 0.56      | 23.03 | 8.13   | 31.15               |                           |
|      |                          | Bv    | 32-55                        | 4.6             | 4.1         | 1.53        | 0.15      | 10.35 | 8.25   | 18.60               |                           |
|      |                          | Bv/C  | 55-130                       | 4.7             | 4.2         | 0.93        | 0.08      | 6.00  | 5.80   | 11.80               |                           |
|      |                          | C     | >130                         | 4.7             | 4.3         | 0.66        | 0.09      | 5.85  | 6.37   | 12.22               |                           |

Explanations: BP – Biała Podlaska, LU – Lubartów, T – Tarnobrzeg, DG – domestic garden,

AG – allotment garden, A – arable field
