# Supplementary material
Source: MDPI journal article supplement (https://www.mdpi.com/2073-445X/10/9/886)
Supplement: s1 [file s1]

**S4 Table. Content of the forms and values of Zn pollution indices in silty soils**

| City | Land use<br>/<br>Horizon | Depth<br>[cm] | Zn <sub>t</sub> | Zn <sub>a</sub> | Fractions [mg/kg] |      |       |                                | Zn indices     |                  |       |       |       |
|------|--------------------------|---------------|-----------------|-----------------|-------------------|------|-------|--------------------------------|----------------|------------------|-------|-------|-------|
|      |                          |               | [mg/kg]         | I               | II                | III  | IV    | C <sub>a</sub> /C <sub>t</sub> | C <sub>f</sub> | I <sub>geo</sub> | BF    |       |       |
| LB   | DG                       | Ap            | 0-27            | 18.20           | 18.40             | 3.09 | 2.88  | 2.17                           | 10.06          | 101.08           | 1.51  | 0.01  | 44.74 |
|      |                          | A/Et          | 27-60           | 12.40           | 4.71              | 1.45 | 1.57  | 1.54                           | 7.84           | 37.95            | 1.03  | 0.00  | 36.81 |
|      |                          | Bt            | 60-85           | 15.15           | 2.08              | 1.71 | 1.43  | 1.60                           | 10.41          | 13.70            | 1.26  | 0.00  | 31.30 |
|      |                          | C             | >85             | 12.05           | 1.93              | 2.02 | 1.53  | 1.93                           | 6.58           | 16.02            | -     | -     | 45.43 |
|      | AG                       | Ap            | 0-25            | 26.90           | 19.75             | 3.13 | 3.22  | 2.05                           | 18.51          | 73.42            | 1.74  | 0.22  | 31.19 |
|      |                          | Et            | 25-45           | 13.22           | 6.18              | 1.59 | 1.78  | 1.74                           | 8.10           | 46.78            | 0.86  | 0.00  | 38.70 |
|      |                          | Bt            | 45-55           | 7.39            | 5.68              | 1.90 | 1.92  | 1.61                           | 1.97           | 76.79            | 0.48  | 0.00  | 73.37 |
|      |                          | C             | >55             | 15.43           | 5.13              | 1.69 | 2.17  | 2.01                           | 9.55           | 33.23            | -     | -     | 38.09 |
|      | A                        | Ap            | 0-25            | 28.18           | 8.97              | 2.22 | 2.50  | 2.48                           | 20.98          | 31.85            | 2.15  | 0.90  | 25.53 |
|      |                          | Et            | 25-50           | 11.60           | 4.26              | 2.19 | 1.65  | 2.13                           | 5.63           | 36.72            | 0.89  | 0.00  | 51.46 |
|      |                          | Bt1           | 50-60           | 25.85           | 5.24              | 2.46 | 2.24  | 2.15                           | 19.00          | 20.28            | 1.97  | 0.77  | 26.50 |
|      |                          | Bt2           | 60-80           | 21.50           | 3.46              | 1.64 | 1.93  | 1.91                           | 16.02          | 16.10            | 1.64  | 0.51  | 25.51 |
|      |                          | Bt/C          | 80-100          | 15.30           | 2.48              | 2.31 | 2.38  | 2.08                           | 8.53           | 16.23            | 1.17  | 0.02  | 44.26 |
|      |                          | C             | 100-120         | 13.10           | 2.30              | 1.71 | 2.02  | 2.56                           | 6.81           | 17.54            | -     | 0.00  | 48.02 |
|      |                          | C             | 120-140         | 10.08           | 3.05              | 1.55 | 1.98  | 1.78                           | 4.77           | 30.30            | -     | -     | 52.69 |
| P    | DG                       | Ap            | 0-20            | 35.90           | 14.10             | 3.23 | 5.46  | 3.83                           | 23.37          | 39.26            | 1.16  | 0.00  | 34.89 |
|      |                          | A             | 20-41           | 27.40           | 12.60             | 2.99 | 2.40  | 3.10                           | 18.92          | 45.97            | 0.89  | 0.00  | 30.97 |
|      |                          | Et            | 41-67           | 19.25           | 3.32              | 1.45 | 1.90  | 2.29                           | 13.61          | 17.26            | 0.62  | 0.00  | 29.32 |
|      |                          | Bt1           | 67-130          | 22.40           | 4.39              | 0.98 | 1.93  | 1.74                           | 17.75          | 19.58            | 0.73  | 0.00  | 20.78 |
|      |                          | Bt2           | 130-150         | 28.20           | 6.29              | 1.07 | 4.10  | 2.39                           | 20.64          | 22.29            | 0.91  | 0.00  | 26.82 |
|      |                          | C             | >150            | 30.85           | 6.22              | 1.16 | 2.14  | 2.01                           | 25.54          | 20.16            | -     | -     | 17.20 |
|      | AG                       | Ap            | 0-20            | 59.85           | 38.70             | 0.37 | 11.02 | 5.17                           | 43.29          | 64.65            | 2.30  | 0.62  | 27.66 |
|      |                          | A             | 20-33           | 63.90           | 32.20             | 5.95 | 9.59  | 3.68                           | 44.69          | 50.38            | 2.45  | 0.71  | 30.06 |
|      |                          | Et            | 33-59           | 21.95           | 8.21              | 1.68 | 3.11  | 1.96                           | 15.20          | 37.38            | 0.84  | 0.00  | 30.77 |
|      |                          | Bt1           | 59-95           | 28.43           | 5.27              | 1.19 | 2.34  | 2.30                           | 22.60          | 18.52            | 1.09  | 0.00  | 20.51 |
|      |                          | Bt2           | 95-128          | 16.90           | 5.38              | 0.89 | 2.06  | 1.85                           | 12.10          | 31.83            | 0.65  | 0.00  | 28.43 |
|      |                          | C             | >128            | 26.05           | 4.89              | 0.86 | 2.21  | 1.75                           | 21.24          | 18.76            | -     | -     | 18.47 |
|      | A                        | Ap            | 0-25            | 37.70           | 8.89              | 1.66 | 2.94  | 3.32                           | 29.78          | 23.58            | 1.01  | 0.00  | 21.00 |
|      |                          | Bt1           | 25-40           | 39.78           | 5.76              | 1.49 | 1.96  | 1.76                           | 34.57          | 14.47            | 1.06  | 0.00  | 13.10 |
|      |                          | Bt2           | 40-88           | 30.10           | 5.68              | 1.04 | 2.82  | 1.75                           | 24.49          | 18.85            | 0.80  | 0.00  | 18.65 |
| C    |                          | >88           | 37.40           | 8.50            | 1.10              | 3.05 | 1.88  | 31.37                          | 22.72          | -                | -     | 16.12 |       |
| Z    | DG                       | Ap            | 0-24            | 104.00          | 101.10            | 2.74 | 6.54  | 7.05                           | 87.68          | 97.21            | 11.30 | 2.91  | 15.70 |
|      |                          | Et            | 24-60           | 50.55           | 22.00             | 1.40 | 1.68  | 3.02                           | 44.45          | 43.51            | 5.49  | 1.87  | 12.07 |
|      |                          | Bt            | 60-104          | 36.10           | 27.60             | 1.36 | 3.65  | 2.87                           | 28.23          | 76.45            | 3.92  | 1.39  | 21.81 |
|      |                          | C             | >104            | 9.21            | 3.78              | 2.51 | 1.71  | 2.21                           | 2.77           | 41.02            | -     | -     | 69.86 |
|      | AG                       | Ap            | 0-27            | 34.68           | 10.07             | 0.33 | 0.73  | 2.82                           | 3081           | 29.03            | 1.86  | 0.31  | 11.16 |
|      |                          | Bt            | 27-82           | 17.20           | 4.22              | 2.91 | 1.72  | 2.24                           | 10.33          | 24.53            | 0.92  | 0.00  | 39.94 |
|      |                          | C             | >82             | 18.63           | 4.91              | 0.57 | 0.29  | 2.77                           | 15.00          | 26.36            | -     | -     | 19.49 |
|      | A                        | Ap            | 0-23            | 53.86           | 41.51             | 1.31 | 3.65  | 4.27                           | 44.63          | 77.07            | 4.00  | 1.42  | 17.14 |
|      |                          | Et            | 23-39           | 35.38           | 15.03             | 0.56 | 0.36  | 2.23                           | 32.22          | 42.49            | 2.63  | 0.81  | 8.91  |
|      |                          | Bt            | 39-101          | 29.85           | 6.40              | 2.45 | 2.28  | 2.22                           | 22.90          | 21.43            | 2.22  | 0.57  | 23.27 |
| C    | >101                     | 13.45         | 4.68            | 0.73            | 0.87              | 2.01 | 9.85  | 34.76                          | -              | -                | 26.80 |       |       |

Explanations: LB – Lublin, P – Przemyśl, Z – Zamość, DG – domestic garden, AG –

allotment garden, A - arable field
